# Supplementary material for: Transcriptome Analysis of Ramie (Boehmeria nivea L. Gaud.) in Response to Ramie Moth (Cocytodes coerulea Guenée) Infestation
Source: Biomed Res Int. 2016 Feb 29;2016:3702789. doi: 10.1155/2016/3702789 (PMC4789370; doi:10.1155/2016/3702789)
Supplement: Supplementary file 1 — The supplementary materials contain 8 files, they are some important data related to the methods and results of the presented study. These data make paper easier to read and understand. [file 3702789.f1.zip]

Archive with 9 entries (8 files):
- Supplementary materials/
- Supplementary materials/Fig. S1-Length distribution of unigenes in CK, CH and Integrated CK+CH libraries..doc
- Supplementary materials/Fig. S2-Gene Ontology (GO) classifications of assembled unigenes..doc
- Supplementary materials/Fig. S3-Histogram presentation of clusters of orthologous groups (COG) classification..doc
- Supplementary materials/Fig. S4-Up-regulated genes involved in alpha-linolenic acid metabolism that were affected by ramie moth infestation..doc
- Supplementary materials/Table S1-Primer sequences used for qRT-PCR..doc
- Supplementary materials/Table S2-Unigenes annotated to be involved in biological processes of defense response to insect.xls
- Supplementary materials/Table S3-DEG annotated as transcription factors by NR and SwissProt annotation..xls
- Supplementary materials/Table S4-Pathways potentially affected by ramie moth infestation..xls
