# Supplementary material for: Transcriptome Analysis of Ramie (Boehmeria nivea L. Gaud.) in Response to Ramie Moth (Cocytodes coerulea Guenée) Infestation
Source: Biomed Res Int. 2016 Feb 29;2016:3702789. doi: 10.1155/2016/3702789 (PMC4789370; doi:10.1155/2016/3702789)
Supplement: Supplementary file 1 — The supplementary materials contain 8 files, they are some important data related to the methods and results of the presented study. These data make paper easier to read and understand. [file 3702789.f1.zip › Supplementary materials/Table S2-Unigenes annotated to be involved in biological processes of defense response to insect.xls]

## Sheet: Sheet1
Table S2.Genes were annotated to be involved in biological process of defence response to insect by GO analysis ( Gene IDs followed by “­” and “¯” symbols indicate genes were up and down-regulated by Cocytodes caerulea challenge.)
#GeneID	GO_annotation	nr_annotation
comp16474_c0	Biological Process: long-chain fatty acid metabolic process (GO:0001676);; Biological Process: defense response to insect (GO:0002213);; Molecular Function: long-chain fatty acid-CoA ligase activity (GO:0004467);; Cellular Component: nucleus (GO:0005634);; Cellular Component: peroxisome (GO:0005777);; Cellular Component: endoplasmic reticulum (GO:0005783);; Cellular Component: Golgi apparatus (GO…	acyl-activating enzyme 2 [Cannabis sativa]
comp1338289_c0	Biological Process: long-chain fatty acid metabolic process (GO:0001676);; Biological Process: defense response to insect (GO:0002213);; Molecular Function: acyl-CoA dehydrogenase activity (GO:0003995);; Molecular Function: acyl-CoA oxidase activity (GO:0003997);; Cellular Component: nucleus (GO:0005634);; Biological Process: fatty acid beta-oxidation (GO:0006635);; Cellular Component: plasmodesm…	acyl-CoA oxidase [Arabidopsis lyrata subsp. lyrata]
comp40173_c0	Biological Process: long-chain fatty acid metabolic process (GO:0001676);; Biological Process: defense response to insect (GO:0002213);; Molecular Function: acyl-CoA dehydrogenase activity (GO:0003995);; Molecular Function: acyl-CoA oxidase activity (GO:0003997);; Cellular Component: peroxisome (GO:0005777);; Cellular Component: cytosol (GO:0005829);; Biological Process: protein targeting to memb…	acyl-CoA oxidase, putative [Ricinus communis]
comp29947_c0	Biological Process: defense response to insect (GO:0002213);; Biological Process: respiratory burst involved in defense response (GO:0002679);; Molecular Function: DNA binding (GO:0003677);; Molecular Function: sequence-specific DNA binding transcription factor activity (GO:0003700);; Cellular Component: nucleus (GO:0005634);; Cellular Component: cytoplasm (GO:0005737);; Biological Process: regul…	AP2 domain class transcription factor [Malus domestica]
comp1386733_c0	Biological Process: tryptophan biosynthetic process (GO:0000162);; Biological Process: response to reactive oxygen species (GO:0000302);; Biological Process: defense response to insect (GO:0002213);; Biological Process: response to molecule of fungal origin (GO:0002238);; Molecular Function: DNA binding (GO:0003677);; Molecular Function: sequence-specific DNA binding transcription factor activity…	AT4g30210/F9N11_60 [Arabidopsis thaliana]
comp37726_c0 ↓	Biological Process: long-chain fatty acid metabolic process (GO:0001676);; Biological Process: defense response to insect (GO:0002213);; Molecular Function: long-chain fatty acid-CoA ligase activity (GO:0004467);; Cellular Component: nucleus (GO:0005634);; Cellular Component: peroxisome (GO:0005777);; Cellular Component: endoplasmic reticulum (GO:0005783);; Cellular Component: Golgi apparatus (GO…	CCL6 [Humulus lupulus]
comp31290_c0	Biological Process: MAPK cascade (GO:0000165);; Biological Process: nuclear-transcribed mRNA poly(A) tail shortening (GO:0000289);; Biological Process: cell morphogenesis (GO:0000902);; Biological Process: defense response to insect (GO:0002213);; Biological Process: respiratory burst involved in defense response (GO:0002679);; Molecular Function: nucleic acid binding (GO:0003676);; Molecular Fun…	ccr4-associated factor, putative [Ricinus communis]
comp34131_c0	Biological Process: defense response to insect (GO:0002213);; Molecular Function: chitinase activity (GO:0004568);; Cellular Component: extracellular region (GO:0005576);; Cellular Component: nucleus (GO:0005634);; Cellular Component: endoplasmic reticulum lumen (GO:0005788);; Cellular Component: Golgi stack (GO:0005795);; Cellular Component: plasma membrane (GO:0005886);; Biological Process: chi…	Chaperone protein dnaJ, putative [Ricinus communis]
comp36282_c0	Biological Process: defense response to insect (GO:0002213);; Molecular Function: glutamate-cysteine ligase activity (GO:0004357);; Cellular Component: mitochondrion (GO:0005739);; Biological Process: gluconeogenesis (GO:0006094);; Biological Process: glycolysis (GO:0006096);; Biological Process: glutathione biosynthetic process (GO:0006750);; Biological Process: amino acid transport (GO:0006865)…	cinnamyl alcohol dehydrogenase-like protein [Populus trichocarpa]
comp29306_c0	Biological Process: defense response to insect (GO:0002213);; Molecular Function: chitinase activity (GO:0004568);; Molecular Function: protein binding (GO:0005515);; Cellular Component: extracellular region (GO:0005576);; Cellular Component: plasma membrane (GO:0005886);; Biological Process: chitin catabolic process (GO:0006032);; Cellular Component: plant-type cell wall (GO:0009505);; Cellular …	conserved hypothetical protein [Ricinus communis]
comp31453_c0 ¯	Biological Process: defense response to insect (GO:0002213);; Molecular Function: chitinase activity (GO:0004568);; Molecular Function: binding (GO:0005488);; Cellular Component: extracellular region (GO:0005576);; Cellular Component: plasma membrane (GO:0005886);; Biological Process: chitin catabolic process (GO:0006032);; Cellular Component: chloroplast (GO:0009507);; Cellular Component: membra…	conserved hypothetical protein [Ricinus communis]
comp278994_c0	Molecular Function: nucleotide binding (GO:0000166);; Biological Process: defense response to insect (GO:0002213);; Molecular Function: nucleic acid binding (GO:0003676);; Molecular Function: single-stranded DNA binding (GO:0003697);; Molecular Function: RNA binding (GO:0003723);; Molecular Function: helicase activity (GO:0004386);; Molecular Function: chitinase activity (GO:0004568);; Molecular …	DEHA2A09790p [Debaryomyces hansenii CBS767]
comp33112_c0	Biological Process: defense response to insect (GO:0002213);; Molecular Function: DNA binding (GO:0003677);; Molecular Function: chitinase activity (GO:0004568);; Molecular Function: protein serine/threonine kinase activity (GO:0004674);; Molecular Function: binding (GO:0005488);; Cellular Component: extracellular region (GO:0005576);; Cellular Component: nucleus (GO:0005634);; Cellular Component…	DNA binding protein [Arabidopsis lyrata subsp. lyrata]
comp19029_c0	Biological Process: long-chain fatty acid metabolic process (GO:0001676);; Biological Process: defense response to insect (GO:0002213);; Molecular Function: DNA binding (GO:0003677);; Molecular Function: DNA topoisomerase type I activity (GO:0003917);; Molecular Function: DNA topoisomerase (ATP-hydrolyzing) activity (GO:0003918);; Molecular Function: protein binding (GO:0005515);; Cellular Compon…	DNA topoisomerase I alpha isoform 1 [Theobroma cacao]
comp29418_c1	Biological Process: defense response to insect (GO:0002213);; Molecular Function: chitinase activity (GO:0004568);; Molecular Function: binding (GO:0005488);; Cellular Component: extracellular region (GO:0005576);; Cellular Component: cell wall (GO:0005618);; Biological Process: chitin catabolic process (GO:0006032);; Cellular Component: membrane (GO:0016020);; Biological Process: cellular compon…	F-box family protein [Cucumis melo subsp. melo]
comp755856_c0	Biological Process: defense response to insect (GO:0002213);; Molecular Function: glutamate-cysteine ligase activity (GO:0004357);; Molecular Function: ATP binding (GO:0005524);; Cellular Component: mitochondrion (GO:0005739);; Biological Process: gluconeogenesis (GO:0006094);; Biological Process: glycolysis (GO:0006096);; Biological Process: glutathione biosynthetic process (GO:0006750);; Biolog…	gamma-glutamylcysteine synthetase [Brassica juncea]
comp892080_c0	Biological Process: defense response to insect (GO:0002213);; Molecular Function: glutamate-cysteine ligase activity (GO:0004357);; Molecular Function: ATP binding (GO:0005524);; Cellular Component: mitochondrion (GO:0005739);; Biological Process: gluconeogenesis (GO:0006094);; Biological Process: glycolysis (GO:0006096);; Biological Process: glutathione biosynthetic process (GO:0006750);; Biolog…	gamma-glutamylcysteine synthetase, partial [Dimocarpus longan]
comp23468_c0	Molecular Function: RNA binding transcription antitermination factor activity (GO:0001072);; Biological Process: defense response to insect (GO:0002213);; Molecular Function: double-stranded DNA binding (GO:0003690);; Molecular Function: single-stranded DNA binding (GO:0003697);; Molecular Function: mRNA binding (GO:0003729);; Molecular Function: chitinase activity (GO:0004568);; Molecular Functi…	glycine rich protein 2 [Arabidopsis thaliana]
comp1184485_c0	Biological Process: defense response to insect (GO:0002213);; Molecular Function: chitinase activity (GO:0004568);; Molecular Function: protein binding (GO:0005515);; Cellular Component: extracellular region (GO:0005576);; Biological Process: chitin catabolic process (GO:0006032);; Biological Process: mRNA processing (GO:0006397);; Cellular Component: plant-type cell wall (GO:0009505);; Cellular …	glycine-rich protein [Arabidopsis thaliana]
comp16420_c0 ¯	Biological Process: defense response to insect (GO:0002213);; Molecular Function: chitinase activity (GO:0004568);; Molecular Function: protein binding (GO:0005515);; Cellular Component: extracellular region (GO:0005576);; Cellular Component: nucleus (GO:0005634);; Cellular Component: mitochondrion (GO:0005739);; Biological Process: chitin catabolic process (GO:0006032);; Cellular Component: plan…	glycine-rich protein 23 [Arabidopsis thaliana]
comp1349536_c0	Biological Process: alternative nuclear mRNA splicing, via spliceosome (GO:0000380);; Biological Process: defense response to insect (GO:0002213);; Molecular Function: double-stranded DNA binding (GO:0003690);; Molecular Function: single-stranded DNA binding (GO:0003697);; Molecular Function: mRNA binding (GO:0003729);; Molecular Function: chitinase activity (GO:0004568);; Molecular Function: pro…	glycine-rich_protein_(aa1-291) [Brassica napus]
comp31379_c0	Biological Process: defense response to insect (GO:0002213);; Molecular Function: acid phosphatase activity (GO:0003993);; Cellular Component: vacuole (GO:0005773);; Biological Process: response to oxidative stress (GO:0006979);; Biological Process: response to wounding (GO:0009611);; Biological Process: cell growth (GO:0016049);; Cellular Component: cytosolic ribosome (GO:0022626);; Biological P…	HAD superfamily, subfamily IIIB acid phosphatase [Theobroma cacao]
comp31379_c0	Biological Process: defense response to insect (GO:0002213);; Molecular Function: acid phosphatase activity (GO:0003993);; Cellular Component: vacuole (GO:0005773);; Biological Process: response to oxidative stress (GO:0006979);; Biological Process: response to wounding (GO:0009611);; Biological Process: cell growth (GO:0016049);; Cellular Component: cytosolic ribosome (GO:0022626);; Biological P…	HAD superfamily, subfamily IIIB acid phosphatase [Theobroma cacao]
comp15649_c0 ­	Biological Process: defense response to insect (GO:0002213);; Molecular Function: serine-type endopeptidase inhibitor activity (GO:0004867);; Cellular Component: extracellular region (GO:0005576);; Biological Process: response to wounding (GO:0009611);; Biological Process: defense response to fungus (GO:0050832);;	hypothetical protein ARALYDRAFT_331046 [Arabidopsis lyrata subsp. lyrata]
comp804042_c0	Biological Process: polysaccharide biosynthetic process (GO:0000271);; Biological Process: defense response to insect (GO:0002213);; Molecular Function: acid phosphatase activity (GO:0003993);; Cellular Component: extracellular region (GO:0005576);; Cellular Component: vacuole (GO:0005773);; Cellular Component: vacuolar membrane (GO:0005774);; Biological Process: response to oxidative stress (GO:…	hypothetical protein ARALYDRAFT_917224 [Arabidopsis lyrata subsp. lyrata]
comp27691_c0	Biological Process: defense response to insect (GO:0002213);; Molecular Function: serine-type endopeptidase inhibitor activity (GO:0004867);; Cellular Component: extracellular region (GO:0005576);; Biological Process: response to stress (GO:0006950);; Biological Process: response to wounding (GO:0009611);; Biological Process: defense response to fungus (GO:0050832);;	hypothetical protein CARUB_v10027471mg [Capsella rubella]
comp39830_c0 ­	Biological Process: defense response to insect (GO:0002213);; Molecular Function: serine-type endopeptidase inhibitor activity (GO:0004867);; Biological Process: defense response to fungus (GO:0050832);;	hypothetical protein CARUB_v10027471mg [Capsella rubella]
comp36636_c0 ­	Biological Process: defense response to insect (GO:0002213);; Molecular Function: serine-type endopeptidase inhibitor activity (GO:0004867);; Cellular Component: extracellular region (GO:0005576);; Biological Process: response to wounding (GO:0009611);; Biological Process: defense response to fungus (GO:0050832);;	hypothetical protein CARUB_v10027472mg [Capsella rubella]
comp14233_c0	Biological Process: defense response to insect (GO:0002213);; Molecular Function: chitinase activity (GO:0004568);; Molecular Function: protein binding (GO:0005515);; Cellular Component: extracellular region (GO:0005576);; Biological Process: chitin catabolic process (GO:0006032);; Cellular Component: plant-type cell wall (GO:0009505);; Cellular Component: plasmodesma (GO:0009506);; Cellular Comp…	hypothetical protein EMIHUDRAFT_311627 [Emiliania huxleyi CCMP1516]
comp28705_c0	Biological Process: defense response to insect (GO:0002213);; Molecular Function: chitinase activity (GO:0004568);; Molecular Function: protein binding (GO:0005515);; Cellular Component: extracellular region (GO:0005576);; Biological Process: chitin catabolic process (GO:0006032);; Biological Process: mRNA processing (GO:0006397);; Cellular Component: plant-type cell wall (GO:0009505);; Cellular …	hypothetical protein EMIHUDRAFT_311627 [Emiliania huxleyi CCMP1516]
comp8359_c0	Biological Process: defense response to insect (GO:0002213);; Molecular Function: chitinase activity (GO:0004568);; Molecular Function: protein binding (GO:0005515);; Cellular Component: extracellular region (GO:0005576);; Biological Process: chitin catabolic process (GO:0006032);; Biological Process: mRNA processing (GO:0006397);; Cellular Component: plant-type cell wall (GO:0009505);; Cellular …	hypothetical protein EMIHUDRAFT_311627 [Emiliania huxleyi CCMP1516]
comp17522_c0	Biological Process: defense response to insect (GO:0002213);; Molecular Function: chitinase activity (GO:0004568);; Molecular Function: binding (GO:0005488);; Cellular Component: extracellular region (GO:0005576);; Cellular Component: plasma membrane (GO:0005886);; Biological Process: chitin catabolic process (GO:0006032);; Cellular Component: plant-type cell wall (GO:0009505);; Biological Proces…	hypothetical protein EMIHUDRAFT_311627 [Emiliania huxleyi CCMP1516]
comp28207_c0	Biological Process: alternative nuclear mRNA splicing, via spliceosome (GO:0000380);; Molecular Function: RNA binding transcription antitermination factor activity (GO:0001072);; Biological Process: defense response to insect (GO:0002213);; Molecular Function: double-stranded DNA binding (GO:0003690);; Molecular Function: single-stranded DNA binding (GO:0003697);; Molecular Function: mRNA binding…	hypothetical protein EMIHUDRAFT_311627 [Emiliania huxleyi CCMP1516]
comp528920_c0	Biological Process: defense response to insect (GO:0002213);; Molecular Function: chitinase activity (GO:0004568);; Molecular Function: protein binding (GO:0005515);; Cellular Component: extracellular region (GO:0005576);; Biological Process: chitin catabolic process (GO:0006032);; Cellular Component: plant-type cell wall (GO:0009505);; Cellular Component: plasmodesma (GO:0009506);; Biological Pr…	hypothetical protein EMIHUDRAFT_317023 [Emiliania huxleyi CCMP1516]
comp1616559_c0	Biological Process: defense response to insect (GO:0002213);; Molecular Function: chitinase activity (GO:0004568);; Molecular Function: binding (GO:0005488);; Cellular Component: extracellular region (GO:0005576);; Biological Process: chitin catabolic process (GO:0006032);; Cellular Component: plant-type cell wall (GO:0009505);; Biological Process: flower development (GO:0009908);; Cellular Compo…	hypothetical protein EMIHUDRAFT_317023 [Emiliania huxleyi CCMP1516]
comp9392_c0	Biological Process: defense response to insect (GO:0002213);; Molecular Function: chitinase activity (GO:0004568);; Molecular Function: binding (GO:0005488);; Cellular Component: extracellular region (GO:0005576);; Biological Process: chitin catabolic process (GO:0006032);; Cellular Component: plant-type cell wall (GO:0009505);; Biological Process: anatomical structure morphogenesis (GO:0009653);…	hypothetical protein EMIHUDRAFT_98641 [Emiliania huxleyi CCMP1516]
comp28371_c0	Biological Process: defense response to insect (GO:0002213);; Biological Process: developmental process involved in reproduction (GO:0003006);; Molecular Function: chitinase activity (GO:0004568);; Molecular Function: protein binding (GO:0005515);; Cellular Component: extracellular region (GO:0005576);; Biological Process: chitin catabolic process (GO:0006032);; Cellular Component: plant-type cel…	hypothetical protein FOSTERSO_5104 [Saccharomyces cerevisiae FostersO]
comp32058_c1	Biological Process: polysaccharide catabolic process (GO:0000272);; Biological Process: defense response to insect (GO:0002213);; Molecular Function: chitinase activity (GO:0004568);; Cellular Component: extracellular region (GO:0005576);; Cellular Component: cell wall (GO:0005618);; Cellular Component: vacuole (GO:0005773);; Cellular Component: plasma membrane (GO:0005886);; Biological Process: …	hypothetical protein OsI_19883 [Oryza sativa Indica Group]
comp1310719_c0	Biological Process: defense response to insect (GO:0002213);; Molecular Function: single-stranded DNA binding (GO:0003697);; Molecular Function: RNA binding (GO:0003723);; Molecular Function: chitinase activity (GO:0004568);; Molecular Function: copper ion binding (GO:0005507);; Molecular Function: protein binding (GO:0005515);; Molecular Function: ATP binding (GO:0005524);; Cellular Component: e…	hypothetical protein OsJ_21137 [Oryza sativa Japonica Group]
comp39128_c0	Molecular Function: nucleotide binding (GO:0000166);; Biological Process: microtubule cytoskeleton organization (GO:0000226);; Biological Process: mitotic cell cycle (GO:0000278);; Biological Process: cytokinesis (GO:0000910);; Biological Process: cytokinesis by cell plate formation (GO:0000911);; Biological Process: defense response to insect (GO:0002213);; Molecular Function: DNA binding (GO:00…	hypothetical protein PRUPE_ppa000070mg [Prunus persica]
comp38456_c0	Biological Process: defense response to insect (GO:0002213);; Molecular Function: chitinase activity (GO:0004568);; Molecular Function: binding (GO:0005488);; Cellular Component: extracellular region (GO:0005576);; Cellular Component: nucleus (GO:0005634);; Cellular Component: plasma membrane (GO:0005886);; Biological Process: chitin catabolic process (GO:0006032);; Biological Process: rRNA proce…	hypothetical protein PRUPE_ppa000786mg [Prunus persica]
comp32194_c0	Biological Process: defense response to insect (GO:0002213);; Molecular Function: chitinase activity (GO:0004568);; Molecular Function: protein binding (GO:0005515);; Cellular Component: extracellular region (GO:0005576);; Cellular Component: mitochondrion (GO:0005739);; Biological Process: chitin catabolic process (GO:0006032);; Molecular Function: GTP diphosphokinase activity (GO:0008728);; Cel…	hypothetical protein PRUPE_ppa001446mg [Prunus persica]
comp37333_c0	Biological Process: mitotic cell cycle (GO:0000278);; Biological Process: long-chain fatty acid metabolic process (GO:0001676);; Biological Process: defense response to insect (GO:0002213);; Molecular Function: long-chain fatty acid-CoA ligase activity (GO:0004467);; Cellular Component: peroxisome (GO:0005777);; Cellular Component: endoplasmic reticulum (GO:0005783);; Cellular Component: Golgi ap…	hypothetical protein PRUPE_ppa002256mg [Prunus persica]
comp33763_c1	Biological Process: tryptophan biosynthetic process (GO:0000162);; Biological Process: response to reactive oxygen species (GO:0000302);; Biological Process: defense response to insect (GO:0002213);; Biological Process: response to molecule of fungal origin (GO:0002238);; Molecular Function: DNA binding (GO:0003677);; Molecular Function: sequence-specific DNA binding transcription factor activity…	hypothetical protein PRUPE_ppa002280mg [Prunus persica]
comp16533_c0	Biological Process: defense response to insect (GO:0002213);; Molecular Function: DNA binding (GO:0003677);; Molecular Function: sequence-specific DNA binding transcription factor activity (GO:0003700);; Molecular Function: chitinase activity (GO:0004568);; Cellular Component: extracellular region (GO:0005576);; Cellular Component: nucleus (GO:0005634);; Biological Process: chitin catabolic proce…	hypothetical protein PRUPE_ppa002404mg [Prunus persica]
comp41219_c0	Biological Process: long-chain fatty acid metabolic process (GO:0001676);; Biological Process: defense response to insect (GO:0002213);; Molecular Function: long-chain fatty acid-CoA ligase activity (GO:0004467);; Cellular Component: nucleus (GO:0005634);; Cellular Component: peroxisome (GO:0005777);; Cellular Component: endoplasmic reticulum (GO:0005783);; Cellular Component: Golgi apparatus (GO…	hypothetical protein PRUPE_ppa002531mg [Prunus persica]
comp31619_c1	Biological Process: defense response to insect (GO:0002213);; Molecular Function: chitinase activity (GO:0004568);; Molecular Function: protein binding (GO:0005515);; Cellular Component: extracellular region (GO:0005576);; Biological Process: chitin catabolic process (GO:0006032);; Biological Process: circadian rhythm (GO:0007623);; Cellular Component: plant-type cell wall (GO:0009505);; Cellular…	hypothetical protein PRUPE_ppa003698mg [Prunus persica]
comp35020_c1	Biological Process: defense response to insect (GO:0002213);; Molecular Function: glutamate-cysteine ligase activity (GO:0004357);; Molecular Function: ATP binding (GO:0005524);; Cellular Component: mitochondrion (GO:0005739);; Biological Process: gluconeogenesis (GO:0006094);; Biological Process: glycolysis (GO:0006096);; Biological Process: glutathione biosynthetic process (GO:0006750);; Biolog…	hypothetical protein PRUPE_ppa004151mg [Prunus persica]
comp38690_c0 ­	Biological Process: defense response to insect (GO:0002213);; Molecular Function: chitinase activity (GO:0004568);; Molecular Function: proline dehydrogenase activity (GO:0004657);; Cellular Component: extracellular region (GO:0005576);; Cellular Component: mitochondrion (GO:0005739);; Biological Process: chitin catabolic process (GO:0006032);; Biological Process: glutamate biosynthetic process (…	hypothetical protein PRUPE_ppa004722mg [Prunus persica]
comp39908_c0	Biological Process: maltose metabolic process (GO:0000023);; Biological Process: sulfate assimilation (GO:0000103);; Biological Process: selenium compound metabolic process (GO:0001887);; Biological Process: defense response to insect (GO:0002213);; Molecular Function: chitinase activity (GO:0004568);; Molecular Function: sulfate adenylyltransferase (ATP) activity (GO:0004781);; Cellular Componen…	hypothetical protein PRUPE_ppa005353mg [Prunus persica]
comp36066_c2	Biological Process: sulfur amino acid metabolic process (GO:0000096);; Biological Process: defense response to insect (GO:0002213);; Molecular Function: GTPase activity (GO:0003924);; Molecular Function: phospholipase activity (GO:0004620);; Molecular Function: triglyceride lipase activity (GO:0004806);; Cellular Component: extracellular region (GO:0005576);; Cellular Component: nucleus (GO:00056…	hypothetical protein PRUPE_ppa006507mg [Prunus persica]
comp30564_c0 ¯	Biological Process: long-chain fatty acid metabolic process (GO:0001676);; Biological Process: defense response to insect (GO:0002213);; Molecular Function: transporter activity (GO:0005215);; Cellular Component: mitochondrion (GO:0005739);; Cellular Component: endoplasmic reticulum membrane (GO:0005789);; Cellular Component: plasma membrane (GO:0005886);; Biological Process: unsaturated fatty ac…	hypothetical protein PRUPE_ppa006843mg [Prunus persica]
comp31577_c0	Biological Process: sulfur amino acid metabolic process (GO:0000096);; Biological Process: defense response to insect (GO:0002213);; Molecular Function: stearoyl-CoA 9-desaturase activity (GO:0004768);; Biological Process: glycine catabolic process (GO:0006546);; Biological Process: fatty acid biosynthetic process (GO:0006633);; Biological Process: unsaturated fatty acid biosynthetic process (GO:…	hypothetical protein PRUPE_ppa006858mg [Prunus persica]
comp31577_c1	Biological Process: sulfur amino acid metabolic process (GO:0000096);; Biological Process: defense response to insect (GO:0002213);; Molecular Function: stearoyl-CoA 9-desaturase activity (GO:0004768);; Biological Process: glycine catabolic process (GO:0006546);; Biological Process: fatty acid biosynthetic process (GO:0006633);; Biological Process: unsaturated fatty acid biosynthetic process (GO:…	hypothetical protein PRUPE_ppa006858mg [Prunus persica]
comp36672_c1	Biological Process: defense response to insect (GO:0002213);; Molecular Function: glutamate-cysteine ligase activity (GO:0004357);; Cellular Component: mitochondrion (GO:0005739);; Biological Process: gluconeogenesis (GO:0006094);; Biological Process: glycolysis (GO:0006096);; Biological Process: glutathione biosynthetic process (GO:0006750);; Biological Process: amino acid transport (GO:0006865)…	hypothetical protein PRUPE_ppa007622mg [Prunus persica]
comp34959_c0	Biological Process: defense response to insect (GO:0002213);; Molecular Function: glutamate-cysteine ligase activity (GO:0004357);; Cellular Component: mitochondrion (GO:0005739);; Biological Process: gluconeogenesis (GO:0006094);; Biological Process: glycolysis (GO:0006096);; Biological Process: glutathione biosynthetic process (GO:0006750);; Biological Process: amino acid transport (GO:0006865)…	hypothetical protein PRUPE_ppa007626mg [Prunus persica]
comp34959_c1	Biological Process: defense response to insect (GO:0002213);; Molecular Function: glutamate-cysteine ligase activity (GO:0004357);; Cellular Component: mitochondrion (GO:0005739);; Biological Process: gluconeogenesis (GO:0006094);; Biological Process: glycolysis (GO:0006096);; Biological Process: glutathione biosynthetic process (GO:0006750);; Biological Process: amino acid transport (GO:0006865)…	hypothetical protein PRUPE_ppa007626mg [Prunus persica]
comp35270_c0	Molecular Function: nucleotide binding (GO:0000166);; Biological Process: defense response to insect (GO:0002213);; Molecular Function: glutamate-cysteine ligase activity (GO:0004357);; Cellular Component: cytoplasm (GO:0005737);; Cellular Component: mitochondrion (GO:0005739);; Biological Process: gluconeogenesis (GO:0006094);; Biological Process: glycolysis (GO:0006096);; Biological Process: gl…	hypothetical protein PRUPE_ppa007678mg [Prunus persica]
comp34602_c0	Biological Process: defense response to insect (GO:0002213);; Molecular Function: chitinase activity (GO:0004568);; Molecular Function: protein binding (GO:0005515);; Cellular Component: extracellular region (GO:0005576);; Cellular Component: nucleus (GO:0005634);; Biological Process: chitin catabolic process (GO:0006032);; Biological Process: 7-methylguanosine mRNA capping (GO:0006370);; Molecul…	hypothetical protein PRUPE_ppa007690mg [Prunus persica]
comp26839_c0	Biological Process: defense response to insect (GO:0002213);; Molecular Function: chitinase activity (GO:0004568);; Molecular Function: protein binding (GO:0005515);; Cellular Component: extracellular region (GO:0005576);; Cellular Component: plasma membrane (GO:0005886);; Biological Process: chitin catabolic process (GO:0006032);; Cellular Component: plant-type cell wall (GO:0009505);; Cellular …	hypothetical protein PRUPE_ppa008910mg [Prunus persica]
comp29322_c0 ¯	Biological Process: defense response to insect (GO:0002213);; Molecular Function: chitinase activity (GO:0004568);; Cellular Component: extracellular region (GO:0005576);; Biological Process: chitin catabolic process (GO:0006032);; Cellular Component: membrane (GO:0016020);; Biological Process: cellular component organization (GO:0016043);; Biological Process: primary metabolic process (GO:004423…	hypothetical protein PRUPE_ppa008996mg [Prunus persica]
comp30141_c0	Biological Process: defense response to insect (GO:0002213);; Molecular Function: single-stranded DNA binding (GO:0003697);; Molecular Function: RNA binding (GO:0003723);; Molecular Function: chitinase activity (GO:0004568);; Molecular Function: protein binding (GO:0005515);; Cellular Component: extracellular region (GO:0005576);; Biological Process: chitin catabolic process (GO:0006032);; Biolog…	hypothetical protein PRUPE_ppa009469mg [Prunus persica]
comp31662_c0	Biological Process: MAPK cascade (GO:0000165);; Biological Process: nuclear-transcribed mRNA poly(A) tail shortening (GO:0000289);; Biological Process: cell morphogenesis (GO:0000902);; Biological Process: defense response to insect (GO:0002213);; Biological Process: respiratory burst involved in defense response (GO:0002679);; Molecular Function: nucleic acid binding (GO:0003676);; Molecular Fun…	hypothetical protein PRUPE_ppa009650mg [Prunus persica]
comp35146_c0	Biological Process: defense response to insect (GO:0002213);; Molecular Function: acid phosphatase activity (GO:0003993);; Cellular Component: vacuole (GO:0005773);; Biological Process: response to oxidative stress (GO:0006979);; Cellular Component: chloroplast (GO:0009507);; Biological Process: response to wounding (GO:0009611);; Cellular Component: cytosolic ribosome (GO:0022626);; Biological P…	hypothetical protein PRUPE_ppa010063mg [Prunus persica]
comp27404_c0	Biological Process: defense response to insect (GO:0002213);; Molecular Function: chitinase activity (GO:0004568);; Molecular Function: UDP-glucose transmembrane transporter activity (GO:0005460);; Molecular Function: protein binding (GO:0005515);; Cellular Component: extracellular region (GO:0005576);; Cellular Component: plasma membrane (GO:0005886);; Biological Process: chitin catabolic proces…	hypothetical protein PRUPE_ppa010102mg [Prunus persica]
comp20222_c0	Biological Process: defense response to insect (GO:0002213);; Molecular Function: acid phosphatase activity (GO:0003993);; Cellular Component: extracellular region (GO:0005576);; Cellular Component: vacuole (GO:0005773);; Cellular Component: vacuolar membrane (GO:0005774);; Cellular Component: cytosol (GO:0005829);; Biological Process: response to oxidative stress (GO:0006979);; Biological Proces…	hypothetical protein PRUPE_ppa010268mg [Prunus persica]
comp34206_c0	Biological Process: defense response to insect (GO:0002213);; Molecular Function: chitinase activity (GO:0004568);; Cellular Component: extracellular region (GO:0005576);; Cellular Component: vacuolar membrane (GO:0005774);; Biological Process: chitin catabolic process (GO:0006032);;	hypothetical protein PRUPE_ppa012159mg [Prunus persica]
comp29132_c0 ¯	Biological Process: defense response to insect (GO:0002213);; Molecular Function: acid phosphatase activity (GO:0003993);; Cellular Component: vacuole (GO:0005773);; Biological Process: response to oxidative stress (GO:0006979);; Biological Process: response to wounding (GO:0009611);; Cellular Component: cytosolic ribosome (GO:0022626);; Biological Process: hyperosmotic salinity response (GO:0042…	hypothetical protein PRUPE_ppa016173mg [Prunus persica]
comp31409_c0	Biological Process: defense response to insect (GO:0002213);; Molecular Function: DNA binding (GO:0003677);; Molecular Function: sequence-specific DNA binding transcription factor activity (GO:0003700);; Molecular Function: protein binding (GO:0005515);; Cellular Component: nucleus (GO:0005634);; Biological Process: regulation of transcription, DNA-dependent (GO:0006355);; Biological Process: res…	hypothetical protein PRUPE_ppa017280mg [Prunus persica]
comp18421_c0	Biological Process: defense response to insect (GO:0002213);; Molecular Function: chitinase activity (GO:0004568);; Molecular Function: protein serine/threonine kinase activity (GO:0004674);; Molecular Function: binding (GO:0005488);; Molecular Function: protein binding (GO:0005515);; Cellular Component: extracellular region (GO:0005576);; Cellular Component: plasma membrane (GO:0005886);; Biolog…	hypothetical protein PRUPE_ppa017542mg, partial [Prunus persica]
comp29351_c0	Biological Process: defense response to insect (GO:0002213);; Molecular Function: chitinase activity (GO:0004568);; Molecular Function: enzyme inhibitor activity (GO:0004857);; Cellular Component: extracellular region (GO:0005576);; Biological Process: chitin catabolic process (GO:0006032);; Biological Process: negative regulation of catalytic activity (GO:0043086);; Biological Process: anatomica…	hypothetical protein PRUPE_ppa021753mg [Prunus persica]
comp177803_c0	Biological Process: defense response to insect (GO:0002213);; Molecular Function: chitinase activity (GO:0004568);; Cellular Component: extracellular region (GO:0005576);; Biological Process: chitin catabolic process (GO:0006032);; Cellular Component: membrane (GO:0016020);; Cellular Component: cell periphery (GO:0071944);;	hypothetical protein SELMODRAFT_449338 [Selaginella moellendorffii]
comp31705_c1	Biological Process: defense response to insect (GO:0002213);; Molecular Function: chitinase activity (GO:0004568);; Molecular Function: protein serine/threonine kinase activity (GO:0004674);; Molecular Function: protein binding (GO:0005515);; Cellular Component: extracellular region (GO:0005576);; Cellular Component: plasma membrane (GO:0005886);; Biological Process: polysaccharide metabolic proc…	hypothetical protein VITISV_030073 [Vitis vinifera]
comp9708_c0	Biological Process: defense response to insect (GO:0002213);; Molecular Function: chitinase activity (GO:0004568);; Molecular Function: protein binding (GO:0005515);; Cellular Component: extracellular region (GO:0005576);; Biological Process: chitin catabolic process (GO:0006032);; Biological Process: metabolic process (GO:0008152);; Cellular Component: plant-type cell wall (GO:0009505);; Cellula…	hypothetical protein VITISV_040170 [Vitis vinifera]
comp106_c0	Biological Process: defense response to insect (GO:0002213);; Molecular Function: chitinase activity (GO:0004568);; Molecular Function: binding (GO:0005488);; Cellular Component: extracellular region (GO:0005576);; Biological Process: chitin catabolic process (GO:0006032);; Biological Process: metabolic process (GO:0008152);; Molecular Function: hydrolase activity, acting on glycosyl bonds (GO:00…	hypothetical protein VOLCADRAFT_88258 [Volvox carteri f. nagariensis]
comp40028_c0	Molecular Function: nucleotide binding (GO:0000166);; Biological Process: defense response to insect (GO:0002213);; Molecular Function: sequence-specific DNA binding transcription factor activity (GO:0003700);; Molecular Function: RNA binding (GO:0003723);; Molecular Function: chitinase activity (GO:0004568);; Molecular Function: structural constituent of cell wall (GO:0005199);; Molecular Functi…	hypothetical protein ZEAMMB73_817356, partial [Zea mays]
comp34629_c0	Biological Process: defense response to insect (GO:0002213);; Molecular Function: RNA binding (GO:0003723);; Molecular Function: chitinase activity (GO:0004568);; Molecular Function: protein binding (GO:0005515);; Cellular Component: extracellular region (GO:0005576);; Biological Process: chitin catabolic process (GO:0006032);; Biological Process: mRNA processing (GO:0006397);; Biological Process…	hypothetical protein ZEAMMB73_817356, partial [Zea mays]
comp16220_c0 ¯	Biological Process: defense response to insect (GO:0002213);; Molecular Function: chitinase activity (GO:0004568);; Molecular Function: structural constituent of cell wall (GO:0005199);; Molecular Function: protein binding (GO:0005515);; Cellular Component: extracellular region (GO:0005576);; Cellular Component: nucleus (GO:0005634);; Biological Process: chitin catabolic process (GO:0006032);; Bi…	hypothetical protein ZEAMMB73_817356, partial [Zea mays]
comp154706_c0	Biological Process: defense response to insect (GO:0002213);; Molecular Function: chitinase activity (GO:0004568);; Molecular Function: protein binding (GO:0005515);; Cellular Component: extracellular region (GO:0005576);; Biological Process: chitin catabolic process (GO:0006032);; Biological Process: cell communication (GO:0007154);; Biological Process: circadian rhythm (GO:0007623);; Cellular C…	HyPRP1 [Gossypium hirsutum]
comp32465_c0	Biological Process: defense response to insect (GO:0002213);; Molecular Function: chitinase activity (GO:0004568);; Molecular Function: binding (GO:0005488);; Cellular Component: extracellular region (GO:0005576);; Cellular Component: cell wall (GO:0005618);; Biological Process: chitin catabolic process (GO:0006032);; Biological Process: cellular process (GO:0009987);;	IQ-domain 24, putative [Theobroma cacao]
comp892011_c0	Biological Process: defense response to insect (GO:0002213);; Molecular Function: glucan exo-1,3-beta-glucosidase activity (GO:0004338);; Molecular Function: beta-galactosidase activity (GO:0004565);; Cellular Component: mitochondrion (GO:0005739);; Cellular Component: vacuole (GO:0005773);; Cellular Component: peroxisome (GO:0005777);; Biological Process: carbohydrate metabolic process (GO:00059…	myrosinase [Armoracia rusticana]
comp885546_c0	Biological Process: defense response to insect (GO:0002213);; Cellular Component: vacuole (GO:0005773);; Cellular Component: peroxisome (GO:0005777);; Molecular Function: beta-glucosidase activity (GO:0008422);; Cellular Component: plant-type cell wall (GO:0009505);; Cellular Component: plasmodesma (GO:0009506);; Cellular Component: chloroplast (GO:0009507);; Cellular Component: thylakoid (GO:000…	myrosinase [Armoracia rusticana]
comp361483_c0	Biological Process: tryptophan biosynthetic process (GO:0000162);; Biological Process: response to reactive oxygen species (GO:0000302);; Biological Process: defense response to insect (GO:0002213);; Biological Process: response to molecule of fungal origin (GO:0002238);; Molecular Function: DNA binding (GO:0003677);; Molecular Function: sequence-specific DNA binding transcription factor activity…	NADPH--cytochrome P450 reductase 2 [Arabidopsis thaliana]
comp41394_c0	Biological Process: defense response to insect (GO:0002213);; Molecular Function: chitinase activity (GO:0004568);; Molecular Function: protein binding (GO:0005515);; Cellular Component: extracellular region (GO:0005576);; Biological Process: chitin catabolic process (GO:0006032);; Biological Process: mRNA processing (GO:0006397);; Cellular Component: plant-type cell wall (GO:0009505);; Cellular …	nutrient reservoir, putative [Ricinus communis]
comp38071_c0	Biological Process: tryptophan biosynthetic process (GO:0000162);; Biological Process: response to reactive oxygen species (GO:0000302);; Biological Process: defense response to insect (GO:0002213);; Biological Process: response to molecule of fungal origin (GO:0002238);; Molecular Function: DNA binding (GO:0003677);; Molecular Function: sequence-specific DNA binding transcription factor activity…	P450 reductase 2 [Theobroma cacao]
comp33562_c3	Molecular Function: iron ion binding (GO:0005506);; Cellular Component: chloroplast (GO:0009507);; Biological Process: response to wounding (GO:0009611);; Biological Process: jasmonic acid biosynthetic process (GO:0009695);; Biological Process: response to abscisic acid stimulus (GO:0009737);; Biological Process: response to jasmonic acid stimulus (GO:0009753);; Biological Process: defense respon…	PLAT/LH2 domain-containing lipoxygenase family protein isoform 2 [Theobroma cacao]
comp455022_c0	Biological Process: defense response to insect (GO:0002213);; Molecular Function: chitinase activity (GO:0004568);; Molecular Function: binding (GO:0005488);; Cellular Component: extracellular region (GO:0005576);; Biological Process: chitin catabolic process (GO:0006032);; Cellular Component: plant-type cell wall (GO:0009505);; Cellular Component: membrane (GO:0016020);; Biological Process: cell…	predicted protein [Hordeum vulgare subsp. vulgare]
comp27298_c0	Biological Process: transition metal ion transport (GO:0000041);; Biological Process: defense response to insect (GO:0002213);; Molecular Function: iron ion binding (GO:0005506);; Molecular Function: protein binding (GO:0005515);; Cellular Component: extracellular region (GO:0005576);; Cellular Component: endoplasmic reticulum (GO:0005783);; Molecular Function: electron carrier activity (GO:00090…	predicted protein [Populus trichocarpa]
comp29970_c0	Biological Process: RNA splicing, via endonucleolytic cleavage and ligation (GO:0000394);; Biological Process: defense response to insect (GO:0002213);; Biological Process: respiratory burst involved in defense response (GO:0002679);; Molecular Function: protein serine/threonine kinase activity (GO:0004674);; Molecular Function: protein tyrosine kinase activity (GO:0004713);; Molecular Function: …	predicted protein [Populus trichocarpa]
comp26597_c0	Biological Process: long-chain fatty acid metabolic process (GO:0001676);; Biological Process: defense response to insect (GO:0002213);; Molecular Function: transcription cofactor activity (GO:0003712);; Cellular Component: nucleus (GO:0005634);; Biological Process: regulation of transcription, DNA-dependent (GO:0006355);; Biological Process: fatty acid biosynthetic process (GO:0006633);; Biologi…	predicted protein [Populus trichocarpa]
comp36835_c0	Biological Process: long-chain fatty acid metabolic process (GO:0001676);; Biological Process: defense response to insect (GO:0002213);; Molecular Function: transcription cofactor activity (GO:0003712);; Cellular Component: nucleus (GO:0005634);; Biological Process: regulation of transcription, DNA-dependent (GO:0006355);; Biological Process: fatty acid biosynthetic process (GO:0006633);; Biologi…	predicted protein [Populus trichocarpa]
comp184472_c0	Biological Process: defense response to insect (GO:0002213);; Molecular Function: chitinase activity (GO:0004568);; Molecular Function: protein kinase activity (GO:0004672);; Molecular Function: binding (GO:0005488);; Cellular Component: extracellular region (GO:0005576);; Cellular Component: plasma membrane (GO:0005886);; Biological Process: chitin catabolic process (GO:0006032);; Biological Pro…	predicted protein [Populus trichocarpa]
comp22340_c0	Biological Process: defense response to insect (GO:0002213);; Molecular Function: chitinase activity (GO:0004568);; Molecular Function: protein binding (GO:0005515);; Cellular Component: extracellular region (GO:0005576);; Biological Process: chitin catabolic process (GO:0006032);; Molecular Function: chitin binding (GO:0008061);; Cellular Component: plant-type cell wall (GO:0009505);; Cellular C…	predicted protein [Populus trichocarpa]
comp25408_c0	Biological Process: defense response to insect (GO:0002213);; Molecular Function: chitinase activity (GO:0004568);; Cellular Component: extracellular region (GO:0005576);; Cellular Component: plasma membrane (GO:0005886);; Biological Process: chitin catabolic process (GO:0006032);; Biological Process: acetyl-CoA metabolic process (GO:0006084);; Biological Process: regulation of meristem growth (G…	predicted protein [Populus trichocarpa]
comp1364895_c0	Biological Process: sulfur amino acid metabolic process (GO:0000096);; Biological Process: defense response to insect (GO:0002213);; Molecular Function: stearoyl-CoA 9-desaturase activity (GO:0004768);; Biological Process: glycine catabolic process (GO:0006546);; Biological Process: fatty acid biosynthetic process (GO:0006633);; Biological Process: unsaturated fatty acid biosynthetic process (GO:…	PREDICTED: acyl-[acyl-carrier-protein] desaturase, chloroplastic-like [Solanum lycopersicum]
comp34276_c0	Biological Process: defense response to insect (GO:0002213);; Molecular Function: NADH dehydrogenase activity (GO:0003954);; Molecular Function: NADPH dehydrogenase activity (GO:0003959);; Molecular Function: chitinase activity (GO:0004568);; Cellular Component: extracellular region (GO:0005576);; Cellular Component: mitochondrial intermembrane space (GO:0005758);; Cellular Component: mitochondri…	PREDICTED: alternative NAD(P)H dehydrogenase 2, mitochondrial-like isoform X1 [Cicer arietinum]
comp447575_c0	Biological Process: transition metal ion transport (GO:0000041);; Biological Process: defense response to insect (GO:0002213);; Molecular Function: iron ion binding (GO:0005506);; Molecular Function: protein binding (GO:0005515);; Cellular Component: extracellular region (GO:0005576);; Cellular Component: endoplasmic reticulum (GO:0005783);; Molecular Function: electron carrier activity (GO:00090…	PREDICTED: cytochrome P450 94A1-like [Vitis vinifera]
comp27298_c1	Biological Process: defense response to insect (GO:0002213);; Molecular Function: monooxygenase activity (GO:0004497);; Molecular Function: binding (GO:0005488);; Cellular Component: endoplasmic reticulum (GO:0005783);; Biological Process: fatty acid metabolic process (GO:0006631);; Biological Process: pollen development (GO:0009555);; Biological Process: response to wounding (GO:0009611);; Biolo…	PREDICTED: cytochrome P450 94A1-like [Vitis vinifera]
comp35333_c0	Biological Process: defense response to insect (GO:0002213);; Molecular Function: chitinase activity (GO:0004568);; Molecular Function: ubiquitin-protein ligase activity (GO:0004842);; Cellular Component: extracellular region (GO:0005576);; Cellular Component: nucleus (GO:0005634);; Cellular Component: vacuolar membrane (GO:0005774);; Biological Process: chitin catabolic process (GO:0006032);; Mo…	PREDICTED: E3 ubiquitin protein ligase RIE1-like [Cucumis sativus]
comp35791_c0	Biological Process: defense response to insect (GO:0002213);; Molecular Function: chitinase activity (GO:0004568);; Molecular Function: protein binding (GO:0005515);; Cellular Component: extracellular region (GO:0005576);; Biological Process: chitin catabolic process (GO:0006032);; Biological Process: metabolic process (GO:0008152);; Molecular Function: phosphoglycolate phosphatase activity (GO:0…	PREDICTED: haloacid dehalogenase-like hydrolase domain-containing protein 3-like [Cucumis sativus]
comp33562_c4	Molecular Function: iron ion binding (GO:0005506);; Cellular Component: chloroplast (GO:0009507);; Cellular Component: plastid (GO:0009536);; Biological Process: response to wounding (GO:0009611);; Biological Process: jasmonic acid biosynthetic process (GO:0009695);; Biological Process: response to abscisic acid stimulus (GO:0009737);; Biological Process: response to jasmonic acid stimulus (GO:00…	PREDICTED: linoleate 9S-lipoxygenase 5, chloroplastic-like [Fragaria vesca subsp. vesca]
comp30130_c0	Biological Process: long-chain fatty acid metabolic process (GO:0001676);; Biological Process: defense response to insect (GO:0002213);; Molecular Function: peptide alpha-N-acetyltransferase activity (GO:0004596);; Biological Process: fatty acid biosynthetic process (GO:0006633);;	PREDICTED: N-alpha-acetyltransferase 20 [Vitis vinifera]
comp36992_c0	Biological Process: long-chain fatty acid metabolic process (GO:0001676);; Biological Process: defense response to insect (GO:0002213);; Biological Process: protein glycosylation (GO:0006486);; Biological Process: fatty acid biosynthetic process (GO:0006633);; Molecular Function: acetyltransferase activity (GO:0016407);;	PREDICTED: N-alpha-acetyltransferase 35, NatC auxiliary subunit-like [Fragaria vesca subsp. vesca]
comp1204529_c0	Biological Process: defense response to insect (GO:0002213);; Molecular Function: chitinase activity (GO:0004568);; Molecular Function: protein serine/threonine kinase activity (GO:0004674);; Cellular Component: extracellular region (GO:0005576);; Cellular Component: plasma membrane (GO:0005886);; Biological Process: chitin catabolic process (GO:0006032);; Molecular Function: ion binding (GO:0043…	PREDICTED: pentatricopeptide repeat-containing protein At1g20230-like [Fragaria vesca subsp. vesca]
comp32536_c1	Biological Process: MAPK cascade (GO:0000165);; Biological Process: nuclear-transcribed mRNA poly(A) tail shortening (GO:0000289);; Biological Process: cell morphogenesis (GO:0000902);; Biological Process: defense response to insect (GO:0002213);; Biological Process: respiratory burst involved in defense response (GO:0002679);; Molecular Function: nucleic acid binding (GO:0003676);; Molecular Fun…	PREDICTED: probable CCR4-associated factor 1 homolog 7-like isoform 1 [Glycine max]
comp38988_c0 ­	Biological Process: defense response to insect (GO:0002213);; Molecular Function: hydrolase activity, hydrolyzing O-glycosyl compounds (GO:0004553);; Molecular Function: chitinase activity (GO:0004568);; Cellular Component: extracellular region (GO:0005576);; Cellular Component: plasma membrane (GO:0005886);; Biological Process: sucrose biosynthetic process (GO:0005986);; Biological Process: chit…	PREDICTED: probable galactinol--sucrose galactosyltransferase 1-like [Fragaria vesca subsp. vesca]
comp24964_c0	Biological Process: RNA splicing, via endonucleolytic cleavage and ligation (GO:0000394);; Biological Process: defense response to insect (GO:0002213);; Biological Process: respiratory burst involved in defense response (GO:0002679);; Molecular Function: protein serine/threonine kinase activity (GO:0004674);; Molecular Function: non-membrane spanning protein tyrosine kinase activity (GO:0004715);…	PREDICTED: probable serine/threonine-protein kinase NAK-like [Fragaria vesca subsp. vesca]
comp34304_c0	Biological Process: defense response to insect (GO:0002213);; Molecular Function: chitinase activity (GO:0004568);; Molecular Function: protein binding (GO:0005515);; Cellular Component: extracellular region (GO:0005576);; Cellular Component: cytoplasm (GO:0005737);; Biological Process: chitin catabolic process (GO:0006032);; Biological Process: steroid metabolic process (GO:0008202);; Biological…	PREDICTED: probable steroid reductase DET2 [Vitis vinifera]
comp28528_c0	Biological Process: defense response to insect (GO:0002213);; Molecular Function: chitinase activity (GO:0004568);; Molecular Function: protein kinase activity (GO:0004672);; Molecular Function: protein serine/threonine kinase activity (GO:0004674);; Molecular Function: binding (GO:0005488);; Cellular Component: extracellular region (GO:0005576);; Cellular Component: cell wall (GO:0005618);; Cell…	PREDICTED: proline-rich receptor-like protein kinase PERK10-like [Cucumis sativus]
comp27143_c0	Biological Process: defense response to insect (GO:0002213);; Molecular Function: threonine-type endopeptidase activity (GO:0004298);; Molecular Function: glutamate-cysteine ligase activity (GO:0004357);; Molecular Function: ribonuclease activity (GO:0004540);; Molecular Function: protein binding (GO:0005515);; Cellular Component: nucleus (GO:0005634);; Cellular Component: mitochondrion (GO:00057…	PREDICTED: proteasome subunit alpha type-7 [Vitis vinifera]
comp30309_c0	Biological Process: defense response to insect (GO:0002213);; Molecular Function: chitinase activity (GO:0004568);; Molecular Function: protein binding (GO:0005515);; Cellular Component: extracellular region (GO:0005576);; Cellular Component: mitochondrion (GO:0005739);; Biological Process: chitin catabolic process (GO:0006032);; Cellular Component: plant-type cell wall (GO:0009505);; Cellular Co…	PREDICTED: uncharacterized protein LOC100242357 [Vitis vinifera]
comp1593660_c0	Biological Process: defense response to insect (GO:0002213);; Molecular Function: nucleic acid binding (GO:0003676);; Molecular Function: chitinase activity (GO:0004568);; Cellular Component: extracellular region (GO:0005576);; Biological Process: chitin catabolic process (GO:0006032);;	PREDICTED: uncharacterized protein LOC100255898 [Vitis vinifera]
comp34344_c0	Biological Process: defense response to insect (GO:0002213);; Molecular Function: chitinase activity (GO:0004568);; Molecular Function: protein binding (GO:0005515);; Cellular Component: extracellular region (GO:0005576);; Cellular Component: plasma membrane (GO:0005886);; Biological Process: chitin catabolic process (GO:0006032);; Biological Process: mRNA processing (GO:0006397);; Cellular Compo…	PREDICTED: uncharacterized protein LOC100260988 [Vitis vinifera]
comp26510_c0	Biological Process: defense response to insect (GO:0002213);; Molecular Function: nucleic acid binding (GO:0003676);; Molecular Function: chitinase activity (GO:0004568);; Molecular Function: structural constituent of cell wall (GO:0005199);; Molecular Function: protein binding (GO:0005515);; Cellular Component: extracellular region (GO:0005576);; Cellular Component: nucleus (GO:0005634);; Biolog…	PREDICTED: uncharacterized protein LOC100801057 [Glycine max]
comp46191_c0	Biological Process: G2 phase of mitotic cell cycle (GO:0000085);; Biological Process: defense response to insect (GO:0002213);; Molecular Function: chitinase activity (GO:0004568);; Molecular Function: protein binding (GO:0005515);; Cellular Component: extracellular region (GO:0005576);; Cellular Component: nucleus (GO:0005634);; Cellular Component: plasma membrane (GO:0005886);; Biological Proce…	PREDICTED: uncharacterized protein LOC101204163 [Cucumis sativus]
comp23615_c0	Biological Process: defense response to insect (GO:0002213);; Molecular Function: chitinase activity (GO:0004568);; Molecular Function: structural constituent of cell wall (GO:0005199);; Molecular Function: protein binding (GO:0005515);; Cellular Component: extracellular region (GO:0005576);; Cellular Component: nucleus (GO:0005634);; Cellular Component: plasma membrane (GO:0005886);; Biological …	PREDICTED: uncharacterized protein LOC101245993 [Solanum lycopersicum]
comp1915316_c0	Biological Process: defense response to insect (GO:0002213);; Molecular Function: chitinase activity (GO:0004568);; Molecular Function: protein binding (GO:0005515);; Cellular Component: extracellular region (GO:0005576);; Biological Process: chitin catabolic process (GO:0006032);; Biological Process: mRNA processing (GO:0006397);; Cellular Component: plant-type cell wall (GO:0009505);; Cellular …	PREDICTED: uncharacterized protein LOC101264365 [Solanum lycopersicum]
comp35051_c1	Biological Process: defense response to insect (GO:0002213);; Molecular Function: catalytic activity (GO:0003824);; Molecular Function: chitinase activity (GO:0004568);; Cellular Component: extracellular region (GO:0005576);; Cellular Component: mitochondrion (GO:0005739);; Biological Process: chitin catabolic process (GO:0006032);; Biological Process: metabolic process (GO:0008152);; Cellular Co…	PREDICTED: uncharacterized protein LOC101303827 [Fragaria vesca subsp. vesca]
comp36558_c1	Biological Process: defense response to insect (GO:0002213);; Molecular Function: chitinase activity (GO:0004568);; Molecular Function: iron ion transmembrane transporter activity (GO:0005381);; Cellular Component: extracellular region (GO:0005576);; Cellular Component: vacuolar membrane (GO:0005774);; Biological Process: chitin catabolic process (GO:0006032);; Biological Process: intracellular s…	PREDICTED: vacuolar iron transporter 1-like [Fragaria vesca subsp. vesca]
comp1172352_c0	Biological Process: defense response to insect (GO:0002213);; Molecular Function: serine-type endopeptidase inhibitor activity (GO:0004867);; Cellular Component: extracellular region (GO:0005576);; Biological Process: response to stress (GO:0006950);; Biological Process: response to wounding (GO:0009611);; Biological Process: defense response to fungus (GO:0050832);;	Proteinase inhibitor, putative [Ricinus communis]
comp27465_c0 ¯	Biological Process: defense response to insect (GO:0002213);; Biological Process: respiratory burst involved in defense response (GO:0002679);; Molecular Function: sequence-specific DNA binding transcription factor activity (GO:0003700);; Cellular Component: nucleus (GO:0005634);; Biological Process: transcription, DNA-dependent (GO:0006351);; Biological Process: regulation of transcription, DNA-…	putative dehydration-responsive element binding protein [Broussonetia papyrifera]
comp28652_c0	Cellular Component: plant-type vacuole (GO:0000325);; Biological Process: defense response to insect (GO:0002213);; Molecular Function: ribonuclease activity (GO:0004540);; Molecular Function: chitinase activity (GO:0004568);; Cellular Component: extracellular region (GO:0005576);; Biological Process: carbohydrate metabolic process (GO:0005975);; Biological Process: chitin catabolic process (GO:0…	RecName: Full=Endochitinase 3; Flags: Precursor
comp34431_c1	Biological Process: cell morphogenesis (GO:0000902);; Biological Process: defense response to insect (GO:0002213);; Molecular Function: chitinase activity (GO:0004568);; Molecular Function: protein serine/threonine kinase activity (GO:0004674);; Molecular Function: binding (GO:0005488);; Cellular Component: extracellular region (GO:0005576);; Cellular Component: cell wall (GO:0005618);; Cellular …	RecName: Full=Vegetative cell wall protein gp1; AltName: Full=Hydroxyproline-rich glycoprotein 1; Flags: Precursor
comp34162_c0	Biological Process: sulfur amino acid metabolic process (GO:0000096);; Biological Process: defense response to insect (GO:0002213);; Molecular Function: stearoyl-CoA 9-desaturase activity (GO:0004768);; Biological Process: glycine catabolic process (GO:0006546);; Biological Process: fatty acid biosynthetic process (GO:0006633);; Biological Process: unsaturated fatty acid biosynthetic process (GO:…	stearoyl-acyl carrier protein desaturase [Sesamum indicum]
comp31203_c0 ¯	Biological Process: sulfur amino acid metabolic process (GO:0000096);; Biological Process: defense response to insect (GO:0002213);; Molecular Function: stearoyl-CoA 9-desaturase activity (GO:0004768);; Biological Process: glycine catabolic process (GO:0006546);; Biological Process: fatty acid biosynthetic process (GO:0006633);; Biological Process: unsaturated fatty acid biosynthetic process (GO:…	stearoyl-acyl-carrier protein desaturase, partial [Ricinus communis]
comp25126_c0 ­	Biological Process: defense response to insect (GO:0002213);; Molecular Function: acid phosphatase activity (GO:0003993);; Cellular Component: vacuole (GO:0005773);; Biological Process: response to oxidative stress (GO:0006979);; Biological Process: response to wounding (GO:0009611);; Biological Process: response to jasmonic acid stimulus (GO:0009753);; Cellular Component: cytoplasmic membrane-bo…	Stem 28 kDa glycoprotein precursor, putative [Ricinus communis]
comp146494_c0	Biological Process: defense response to insect (GO:0002213);; Molecular Function: chitinase activity (GO:0004568);; Molecular Function: binding (GO:0005488);; Cellular Component: extracellular region (GO:0005576);; Cellular Component: cell wall (GO:0005618);; Cellular Component: plasma membrane (GO:0005886);; Biological Process: chitin catabolic process (GO:0006032);; Biological Process: mRNA pro…	sulfated surface glycoprotein SSG185
comp30742_c0	Biological Process: MAPK cascade (GO:0000165);; Molecular Function: core promoter proximal region sequence-specific DNA binding (GO:0000987);; Molecular Function: core promoter binding (GO:0001047);; Biological Process: defense response to insect (GO:0002213);; Molecular Function: sequence-specific DNA binding transcription factor activity (GO:0003700);; Molecular Function: chitinase activity (GO…	TCP transcription factor 17 [Solanum lycopersicum]
comp26498_c0	Biological Process: defense response to insect (GO:0002213);; Molecular Function: chitinase activity (GO:0004568);; Molecular Function: protein kinase activity (GO:0004672);; Cellular Component: extracellular region (GO:0005576);; Cellular Component: spindle microtubule (GO:0005876);; Biological Process: chitin catabolic process (GO:0006032);; Biological Process: protein phosphorylation (GO:00064…	Uncharacterized protein isoform 1 [Theobroma cacao]
comp26149_c0	Biological Process: defense response to insect (GO:0002213);; Molecular Function: chitinase activity (GO:0004568);; Molecular Function: protein binding (GO:0005515);; Cellular Component: extracellular region (GO:0005576);; Cellular Component: nucleus (GO:0005634);; Biological Process: chitin catabolic process (GO:0006032);; Cellular Component: plant-type cell wall (GO:0009505);; Cellular Componen…	Uncharacterized protein TCM_021236 [Theobroma cacao]
comp38854_c0	Biological Process: long-chain fatty acid metabolic process (GO:0001676);; Biological Process: defense response to insect (GO:0002213);; Molecular Function: transcription cofactor activity (GO:0003712);; Molecular Function: protein binding (GO:0005515);; Cellular Component: nucleus (GO:0005634);; Cellular Component: mitochondrion (GO:0005739);; Biological Process: regulation of transcription, DNA…	Uncharacterized protein TCM_027312 [Theobroma cacao]
comp38854_c2	Biological Process: long-chain fatty acid metabolic process (GO:0001676);; Biological Process: defense response to insect (GO:0002213);; Molecular Function: DNA binding (GO:0003677);; Molecular Function: transcription cofactor activity (GO:0003712);; Molecular Function: protein binding (GO:0005515);; Cellular Component: nucleus (GO:0005634);; Biological Process: regulation of transcription, DNA-d…	Uncharacterized protein TCM_027312 [Theobroma cacao]
comp16396_c0	Biological Process: defense response to insect (GO:0002213);; Molecular Function: nucleic acid binding (GO:0003676);; Molecular Function: chitinase activity (GO:0004568);; Molecular Function: protein binding (GO:0005515);; Cellular Component: extracellular region (GO:0005576);; Biological Process: chitin catabolic process (GO:0006032);; Biological Process: mRNA processing (GO:0006397);; Cellular …	unnamed protein product [Vitis vinifera]
comp32981_c0	Biological Process: defense response to insect (GO:0002213);; Molecular Function: GTPase activity (GO:0003924);; Molecular Function: phospholipase activity (GO:0004620);; Molecular Function: triglyceride lipase activity (GO:0004806);; Cellular Component: extracellular space (GO:0005615);; Cellular Component: nucleus (GO:0005634);; Cellular Component: mitochondrial matrix (GO:0005759);; Cellular C…	unnamed protein product [Vitis vinifera]
comp32629_c0	Biological Process: defense response to insect (GO:0002213);; Molecular Function: chitinase activity (GO:0004568);; Molecular Function: protein binding (GO:0005515);; Cellular Component: extracellular region (GO:0005576);; Biological Process: chitin catabolic process (GO:0006032);; Cellular Component: plant-type cell wall (GO:0009505);; Biological Process: flower development (GO:0009908);; Cellul…	unnamed protein product [Vitis vinifera]
comp971500_c0	Biological Process: defense response to insect (GO:0002213);; Molecular Function: chitinase activity (GO:0004568);; Molecular Function: binding (GO:0005488);; Cellular Component: extracellular region (GO:0005576);; Cellular Component: cell wall (GO:0005618);; Biological Process: chitin catabolic process (GO:0006032);; Biological Process: embryo development ending in seed dormancy (GO:0009793);; B…	unnamed protein product [Vitis vinifera]
