# Supplementary material for: Transcriptome Analysis of Ramie (Boehmeria nivea L. Gaud.) in Response to Ramie Moth (Cocytodes coerulea Guenée) Infestation
Source: Biomed Res Int. 2016 Feb 29;2016:3702789. doi: 10.1155/2016/3702789 (PMC4789370; doi:10.1155/2016/3702789)
Supplement: Supplementary file 1 — The supplementary materials contain 8 files, they are some important data related to the methods and results of the presented study. These data make paper easier to read and understand. [file 3702789.f1.zip › Supplementary materials/Table S3-DEG annotated as transcription factors by NR and SwissProt annotation..xls]

## Sheet: Sheet2
Table S3 DEGs annotated as Transcription Factors by NR and Swissprot annotation.
gene ID	FDR	Log2FC	regulated	annotation	abbr.
comp35627_c1	0.000187148	1.19728	up	AP2 domain class transcription factor [Malus domestica]	AP2
comp54976_c0	3.57932e-07	-1.53749	down	Auxin response factor 6 GN=ARF6 OS=Arabidopsis thaliana (Mouse-ear cress) PE=1 SV=2	ARF
comp37971_c1	0.00511576	1.02383	up	Auxin response factor 5 GN=F6F9.10 OS=Arabidopsis thaliana (Mouse-ear cress) PE=1 SV=3	ARF
comp20520_c0	0.006964	3.24449	up	Transcription factor bHLH120 GN=MIO24.8 OS=Arabidopsis thaliana (Mouse-ear cress) PE=2 SV=2	bHLH
comp31415_c1	1.62093e-14	-2.02055	down	Transcription factor bHLH62 GN=F21O3.5 OS=Arabidopsis thaliana (Mouse-ear cress) PE=2 SV=1	bHLH
comp24751_c0	0.00199291	-2.01722	down	Transcription factor bHLH149 GN=T12M4.4 OS=Arabidopsis thaliana (Mouse-ear cress) PE=1 SV=1	bHLH
comp31415_c0	9.99201e-16	-2.11452	down	Transcription factor bHLH78 GN=K15N18.2 OS=Arabidopsis thaliana (Mouse-ear cress) PE=2 SV=1	bHLH
comp25744_c0	0.00302509	-1.59238	down	Transcription factor bHLH135 GN=At1g74500 OS=Arabidopsis thaliana (Mouse-ear cress) PE=1 SV=1	bHLH
comp29464_c0	0	-3.74281	down	Transcription factor bHLH93 GN=K21L13.16 OS=Arabidopsis thaliana (Mouse-ear cress) PE=1 SV=1	bHLH
comp26782_c0	0.00414516	-1.03452	down	Transcription factor bHLH35 GN=MUL3.10 OS=Arabidopsis thaliana (Mouse-ear cress) PE=2 SV=1	bHLH
comp31845_c0	1.39588e-12	-2.52151	down	Transcription factor bHLH148 GN=F5E6.8 OS=Arabidopsis thaliana (Mouse-ear cress) PE=1 SV=1	bHLH
comp31468_c0	1.50509e-06	-1.42437	down	Transcription factor bHLH74 GN=T27I1.15 OS=Arabidopsis thaliana (Mouse-ear cress) PE=2 SV=1	bHLH
comp34543_c0	0.00326241	-1.07774	down	Transcription factor bHLH71 GN=MZA15.10 OS=Arabidopsis thaliana (Mouse-ear cress) PE=1 SV=1	bHLH
comp33765_c0	4.06303e-10	-2.36649	down	Transcription factor bHLH57 GN=F11O4.13 OS=Arabidopsis thaliana (Mouse-ear cress) PE=2 SV=1	bHLH
comp37869_c3	0.00426163	-1.03021	down	Transcription factor bHLH149 GN=T12M4.4 OS=Arabidopsis thaliana (Mouse-ear cress) PE=1 SV=1	bHLH
comp4140_c0	0.000899847	3.10747	up	Transcription factor bHLH30 OS=Arabidopsis thaliana (Mouse-ear cress) PE=1 SV=1	bHLH
comp34540_c1	0.000735973	1.18424	up	Transcription factor bHLH51 GN=T7M7.8 OS=Arabidopsis thaliana (Mouse-ear cress) PE=2 SV=1	bHLH
comp36287_c0	3.31957e-14	-2.2768	down	Transcription factor EMB1444 GN=EMB1444 OS=Arabidopsis thaliana (Mouse-ear cress) PE=2 SV=1	bHLH
comp37608_c0	2.3207e-10	-1.66362	down	Transcription factor PIF3 GN=F14J9.19 OS=Arabidopsis thaliana (Mouse-ear cress) PE=1 SV=1	bHLH
comp28902_c0	1.75114e-10	2.03106	up	Transcription factor EMB1444 GN=EMB1444 OS=Arabidopsis thaliana (Mouse-ear cress) PE=2 SV=1	bHLH
comp33936_c0	1.8352e-13	4.9766	up	Transcription factor ATR2 GN=MZA15.18 OS=Arabidopsis thaliana (Mouse-ear cress) PE=1 SV=1	bHLH
comp39167_c1	1.20607e-05	-1.25862	down	basic helix-loop-helix-containing protein, putative [Ricinus communis]	bHLH
comp28930_c0	1.5132e-07	2.85228	up	Basic leucine zipper 1 GN=BZIP1 OS=Arabidopsis thaliana (Mouse-ear cress) PE=1 SV=1	bZIP
comp38572_c2	4.61583e-05	-1.65805	down	C2H2 and C2HC zinc fingers superfamily protein, putative [Theobroma cacao]	C2H2
comp30476_c0	1.35877e-05	-1.36116	down	C2H2L domain class transcription factor [Malus domestica]	C2H2
comp34130_c0	0.00172139	-1.2631	down	CAMTA domain class transcription factor [Malus domestica]	CAMTA
comp36435_c0	5.55112e-16	-2.11313	down	COL domain class transcription factor [Malus domestica]	COL
comp27580_c0	1.6561e-11	2.35511	up	Ethylene-responsive transcription factor 1B GN=K14B15.15 OS=Arabidopsis thaliana (Mouse-ear cress) PE=1 SV=2	EFR
comp33471_c2	0.00983475	-1.1969	down	Ethylene-responsive transcription factor TINY GN=F18A17.60 OS=Arabidopsis thaliana (Mouse-ear cress) PE=2 SV=1	EFR
comp27717_c1	0	-4.19676	down	Ethylene-responsive transcription factor ERF109 GN=ERF109 OS=Arabidopsis thaliana (Mouse-ear cress) PE=1 SV=1	EFR
comp23657_c0	0	-3.22758	down	Ethylene-responsive transcription factor TINY GN=F18A17.60 OS=Arabidopsis thaliana (Mouse-ear cress) PE=2 SV=1	EFR
comp32663_c0	6.90406e-11	-2.99467	down	Ethylene-responsive transcription factor WIN1 GN=F9L1.31 OS=Arabidopsis thaliana (Mouse-ear cress) PE=2 SV=1	EFR
comp27286_c0	2.05726e-07	-3.76864	down	Ethylene-responsive transcription factor ERF034 OS=Arabidopsis thaliana (Mouse-ear cress) PE=2 SV=2	EFR
comp39688_c0	0.000161535	-1.14811	down	ethylene-responsive transcription factor 4-like [Fragaria vesca subsp. vesca]	EFR
comp27465_c0	0	-2.4895	down	Ethylene-responsive transcription factor ERF017 GN=ERF017 OS=Arabidopsis thaliana (Mouse-ear cress) PE=2 SV=1	EFR
comp27900_c0	0.00372893	-1.31006	down	Ethylene-responsive transcription factor ERF003 GN=ERF003 OS=Arabidopsis thaliana (Mouse-ear cress) PE=2 SV=1	EFR
comp30833_c0	3.60974e-06	2.30746	up	Ethylene-responsive transcription factor ERF071 GN=ERF071 OS=Arabidopsis thaliana (Mouse-ear cress) PE=2 SV=1	EFR
comp28735_c0	0.00183293	1.40214	up	Ethylene-responsive transcription factor ERF113 GN=ERF113 OS=Arabidopsis thaliana (Mouse-ear cress) PE=2 SV=1	EFR
comp33977_c1	3.33067e-16	2.55681	up	Ethylene-responsive transcription factor ABR1 GN=MVP7.8 OS=Arabidopsis thaliana (Mouse-ear cress) PE=2 SV=1	EFR
comp35984_c3	4.06384e-05	1.2717	up	Ethylene-responsive transcription factor ERF106 GN=ERF106 OS=Arabidopsis thaliana (Mouse-ear cress) PE=2 SV=1	EFR
comp33832_c0	7.19258e-06	-1.30591	down	Ethylene-responsive transcription factor 5 GN=MQL5_9 OS=Arabidopsis thaliana (Mouse-ear cress) PE=2 SV=1	EFR
comp35136_c0	0.000564101	-1.18473	down	GATA transcription factor 21 GN=MPI10.2 OS=Arabidopsis thaliana (Mouse-ear cress) PE=1 SV=2	GATA
comp34768_c0	2.24558e-11	-1.78197	down	GATA transcription factor 8 GN=GATA8 OS=Arabidopsis thaliana (Mouse-ear cress) PE=2 SV=1	GATA
comp32421_c0	0.000828942	-1.08167	down	Probable transcription factor GLK2 OS=Oryza sativa subsp. japonica (Rice) PE=2 SV=1	GLK
comp32410_c0	0.000484798	1.49966	up	Transcription factor TRY GN=TRY OS=Arabidopsis thaliana (Mouse-ear cress) PE=1 SV=1	HL
comp18772_c0	2.59172e-10	-2.18028	down	Heat stress transcription factor A-2 GN=T19L18.4 OS=Arabidopsis thaliana (Mouse-ear cress) PE=1 SV=1	HSF
comp41274_c0	2.51309e-05	1.31231	up	Heat stress transcription factor A-2c, putative [Theobroma cacao]	HSF
comp33391_c0	2.83351e-12	-1.90253	down	Transcription factor HY5 GN=F2I11_150 OS=Arabidopsis thaliana (Mouse-ear cress) PE=1 SV=1	HY5
comp25569_c0	0.000780173	2.06933	up	myb factor [Humulus lupulus]	myb
comp32260_c0	0.0086222	-1.20276	down	MYB86 Transcription factor GN=F21E10.4 OS=Arabidopsis thaliana (Mouse-ear cress) PE=2 SV=1	myb
comp37436_c1	2.98187e-07	-1.48694	down	Myb domain protein 106 [Theobroma cacao]	myb
comp26765_c0	4.25237e-06	-1.39027	down	MYB1R1 Transcription factor OS=Solanum tuberosum (Potato) PE=2 SV=1	myb
comp21063_c0	9.3739e-06	-1.44899	down	MYB-like transcription factor ETC1 GN=ETC1 OS=Arabidopsis thaliana (Mouse-ear cress) PE=2 SV=1	myb
comp368139_c0	4.73297e-09	-4.77754	down	MYB-like DNA-binding domain protein [Theobroma cacao]	myb
comp35242_c1	1.15679e-10	2.03826	up	Myb transcription factor family protein, putative [Theobroma cacao]	myb
comp34678_c1	5.34507e-05	1.27384	up	Transcription factor CPC GN=CPC OS=Arabidopsis thaliana (Mouse-ear cress) PE=1 SV=1	myb
comp31671_c0	3.30402e-08	2.42779	up	NAC transcription factor 053 [Jatropha curcas]	NAC
comp39104_c1	3.66287e-06	1.51127	up	NAC domain protein, IPR003441 isoform 1 [Theobroma cacao]	NAC
comp38278_c5	0.00947543	1.20553	up	NAC domain class transcription factor [Malus domestica]	NAC
comp36212_c0	9.53682e-14	2.2439	up	NAC domain protein NAC1 [Phaseolus vulgaris]	NAC
comp36538_c0	0.00062494	-1.1171	down	NAC domain protein [Medicago truncatula]	NAC
comp37931_c4	5.7987e-06	1.36564	up	NAC domain protein, IPR003441 [Theobroma cacao]	NAC
comp26591_c0	0.00560302	-1.82201	down	Transcription factor ORG2 GN=F24I3.50 OS=Arabidopsis thaliana (Mouse-ear cress) PE=1 SV=1	ORG
comp29814_c0	0	-3.12814	down	Transcription factor RF2a OS=Oryza sativa subsp. japonica (Rice) PE=1 SV=1	RF2
comp36977_c0	0.00158467	-1.1053	down	Transcription factor RF2b GN=RF2b OS=Oryza sativa subsp. japonica (Rice) PE=1 SV=1	RF2
comp31761_c1	0	-4.16324	down	Transcription factor RF2b GN=RF2b OS=Oryza sativa subsp. japonica (Rice) PE=1 SV=1	RF2
comp25756_c0	0.00588935	-2.45884	down	Transcription factor TGA3 GN=F2E2.14 OS=Arabidopsis thaliana (Mouse-ear cress) PE=1 SV=1	TGA3
comp323827_c0	0.000554347	-3.16822	down	Transcription factor TT2 GN=MOK9.18 OS=Arabidopsis thaliana (Mouse-ear cress) PE=1 SV=1	TT2
comp38401_c0	7.0588e-13	1.96859	up	WRKY transcription factor 69 GN=WRKY69 OS=Arabidopsis thaliana (Mouse-ear cress) PE=2 SV=1	wrky
comp26940_c0	5.6358e-08	1.90444	up	WRKY transcription factor 17 [Jatropha curcas]	wrky
comp32854_c0	0.00635893	-1.07388	down	WRKY family transcription factor, putative isoform 1 [Theobroma cacao]	wrky
comp33206_c0	0.000238992	-1.13519	down	WRKY transcription factor 19 GN=WRKY19 OS=Arabidopsis thaliana (Mouse-ear cress) PE=2 SV=1	wrky
comp275373_c0	0.000216072	-3.53644	down	Axial regulator YABBY 1 GN=F4L23.30 OS=Arabidopsis thaliana (Mouse-ear cress) PE=1 SV=1	YABBY
comp29868_c0	4.93211e-06	-1.89594	down	Zinc finger protein CONSTANS-LIKE 16 GN=COL16 OS=Arabidopsis thaliana (Mouse-ear cress) PE=2 SV=2	ZF
comp33994_c0	6.02873e-05	-1.23329	down	Zinc finger protein ZAT5 GN=ZAT5 OS=Arabidopsis thaliana (Mouse-ear cress) PE=2 SV=1	ZF
comp26412_c0	0.000160825	1.24431	up	Zinc finger A20 and AN1 domain-containing stress-associated protein 8 OS	ZF
comp31034_c0	0.00563996	1.05139	up	Zinc finger protein CONSTANS-LIKE 15 GN=COL15 OS=Arabidopsis thaliana (Mouse-ear cress) PE=2 SV=1	ZF
comp39478_c0	0.000709044	1.15457	up	zinc finger protein, putative [Ricinus communis]	ZF
comp27171_c0	0.000330271	1.18216	up	Zinc finger protein, putative [Theobroma cacao]	ZF
comp35246_c0	0.00222307	-1.0234	down	Zinc finger protein CONSTANS-LIKE 2 OS=Arabidopsis thaliana (Mouse-ear cress) PE=1 SV=1	ZF
comp32006_c0	4.33172e-05	-1.21531	down	Zinc finger protein CONSTANS-LIKE 2 OS=Arabidopsis thaliana (Mouse-ear cress) PE=1 SV=1	ZF
comp32553_c1	0.00196229	-1.1975	down	Zinc finger CCCH domain-containing protein 22 OS=Oryza sativa subsp. japonica (Rice) PE=2 SV=2	ZF
comp16636_c0	6.05001e-07	-1.64005	down	Zinc finger AN1 domain-containing stress-associated protein 12 GN	ZF
comp30347_c0	0	-2.17259	down	zinc finger protein, putative [Ricinus communis]	ZF
comp31881_c0	0	-3.90705	down	zinc finger protein, putative [Ricinus communis]	ZF
comp33994_c3	0.00398088	-1.01576	down	Zinc finger protein ZAT5 GN=ZAT5 OS=Arabidopsis thaliana (Mouse-ear cress) PE=2 SV=1	ZF
comp28108_c0	0	-2.63873	down	Zinc finger protein CONSTANS-LIKE 14 GN=COL14 OS=Arabidopsis thaliana (Mouse-ear cress) PE=2 SV=2	ZF
