# Supplementary material for: Transcriptome Analysis of Ramie (Boehmeria nivea L. Gaud.) in Response to Ramie Moth (Cocytodes coerulea Guenée) Infestation
Source: Biomed Res Int. 2016 Feb 29;2016:3702789. doi: 10.1155/2016/3702789 (PMC4789370; doi:10.1155/2016/3702789)
Supplement: Supplementary file 1 — The supplementary materials contain 8 files, they are some important data related to the methods and results of the presented study. These data make paper easier to read and understand. [file 3702789.f1.zip › Supplementary materials/Table S4-Pathways potentially affected by ramie moth infestation..xls]

## Sheet: Sheet1
Table S6 Pathways potentially affected by ramie moth infestation.
#	Pathway	DEGs with pathway annotation (358)	All genes with pathway annotation (4293)	p_value	Pathway ID
1	Ribosome	84 (23.46%)	510 (11.88%)	9.1329e-11	ko03010
2	alpha-Linolenic acid metabolism	5 (1.4%)	10 (0.23%)	0.00069524	ko00592
3	Carotenoid biosynthesis	8 (2.23%)	29 (0.68%)	0.0019452	ko00906
4	Photosynthesis	21 (5.87%)	131 (3.05%)	0.0024262	ko00195
5	Glycosphingolipid biosynthesis - globo series	4 (1.12%)	9 (0.21%)	0.0042726	ko00603
6	Zeatin biosynthesis	6 (1.68%)	21 (0.49%)	0.0059453	ko00908
7	Valine, leucine and isoleucine degradation	13 (3.63%)	74 (1.72%)	0.0073246	ko00280
8	Ubiquinone and other terpenoid-quinone biosynthesis	7 (1.96%)	32 (0.75%)	0.014317	ko00130
9	Photosynthesis - antenna proteins	9 (2.51%)	51 (1.19%)	0.023228	ko00196
10	Arachidonic acid metabolism	4 (1.12%)	14 (0.33%)	0.024296	ko00590
11	Sulfur metabolism	7 (1.96%)	37 (0.86%)	0.030598	ko00920
12	Pentose and glucuronate interconversions	10 (2.79%)	64 (1.49%)	0.037334	ko00040
13	Isoquinoline alkaloid biosynthesis	4 (1.12%)	17 (0.4%)	0.047392	ko00950
14	Tyrosine metabolism	7 (1.96%)	42 (0.98%)	0.056199	ko00350
15	Lysine degradation	5 (1.4%)	27 (0.63%)	0.0689	ko00310
16	Steroid biosynthesis	5 (1.4%)	28 (0.65%)	0.078412	ko00100
17	Synthesis and degradation of ketone bodies	2 (0.56%)	6 (0.14%)	0.083077	ko00072
18	Biosynthesis of unsaturated fatty acids	6 (1.68%)	39 (0.91%)	0.10142	ko01040
19	Lysine biosynthesis	4 (1.12%)	22 (0.51%)	0.10523	ko00300
20	Nitrogen metabolism	9 (2.51%)	69 (1.61%)	0.11731	ko00910
21	Phenylalanine metabolism	9 (2.51%)	70 (1.63%)	0.12533	ko00360
22	Galactose metabolism	5 (1.4%)	34 (0.79%)	0.14881	ko00052
23	Other types of O-glycan biosynthesis	1 (0.28%)	2 (0.05%)	0.15985	ko00514
24	Tryptophan metabolism	6 (1.68%)	45 (1.05%)	0.16832	ko00380
25	Sphingolipid metabolism	3 (0.84%)	18 (0.42%)	0.18532	ko00600
26	Fatty acid metabolism	7 (1.96%)	57 (1.33%)	0.19372	ko00071
27	Vitamin B6 metabolism	2 (0.56%)	10 (0.23%)	0.20038	ko00750
28	Flavonoid biosynthesis	4 (1.12%)	28 (0.65%)	0.20105	ko00941
29	Fatty acid elongation in mitochondria	1 (0.28%)	3 (0.07%)	0.22994	ko00062
30	Diterpenoid biosynthesis	2 (0.56%)	11 (0.26%)	0.23217	ko00904
31	Riboflavin metabolism	2 (0.56%)	11 (0.26%)	0.23217	ko00740
32	Ether lipid metabolism	3 (0.84%)	21 (0.49%)	0.25299	ko00565
33	Ascorbate and aldarate metabolism	7 (1.96%)	62 (1.44%)	0.25641	ko00053
34	Tropane, piperidine and pyridine alkaloid biosynthesis	3 (0.84%)	22 (0.51%)	0.27632	ko00960
35	Flavone and flavonol biosynthesis	1 (0.28%)	4 (0.09%)	0.2942	ko00944
36	Glycosphingolipid biosynthesis - ganglio series	1 (0.28%)	4 (0.09%)	0.2942	ko00604
37	Propanoate metabolism	6 (1.68%)	55 (1.28%)	0.30805	ko00640
38	Starch and sucrose metabolism	12 (3.35%)	122 (2.84%)	0.31724	ko00500
39	Fatty acid biosynthesis	4 (1.12%)	35 (0.82%)	0.33345	ko00061
40	Terpenoid backbone biosynthesis	5 (1.4%)	46 (1.07%)	0.33734	ko00900
41	Nicotinate and nicotinamide metabolism	2 (0.56%)	15 (0.35%)	0.3596	ko00760
42	Histidine metabolism	3 (0.84%)	27 (0.63%)	0.39406	ko00340
43	Selenocompound metabolism	3 (0.84%)	28 (0.65%)	0.41722	ko00450
44	Glycosaminoglycan degradation	1 (0.28%)	7 (0.16%)	0.45663	ko00531
45	Circadian rhythm - mammal	1 (0.28%)	7 (0.16%)	0.45663	ko04710
46	Pentose phosphate pathway	7 (1.96%)	80 (1.86%)	0.50569	ko00030
47	Stilbenoid, diarylheptanoid and gingerol biosynthesis	2 (0.56%)	20 (0.47%)	0.5063	ko00945
48	One carbon pool by folate	3 (0.84%)	32 (0.75%)	0.50639	ko00670
49	Glutathione metabolism	7 (1.96%)	81 (1.89%)	0.51923	ko00480
50	Glycerophospholipid metabolism	5 (1.4%)	58 (1.35%)	0.53798	ko00564
51	Brassinosteroid biosynthesis	1 (0.28%)	9 (0.21%)	0.54362	ko00905
52	Fructose and mannose metabolism	7 (1.96%)	84 (1.96%)	0.55899	ko00051
53	Phenylpropanoid biosynthesis	7 (1.96%)	84 (1.96%)	0.55899	ko00940
54	beta-Alanine metabolism	4 (1.12%)	47 (1.09%)	0.55959	ko00410
55	Butanoate metabolism	3 (0.84%)	35 (0.82%)	0.5684	ko00650
56	Glycine, serine and threonine metabolism	7 (1.96%)	85 (1.98%)	0.57191	ko00260
57	Porphyrin and chlorophyll metabolism	6 (1.68%)	73 (1.7%)	0.57724	ko00860
58	Glycerolipid metabolism	4 (1.12%)	49 (1.14%)	0.5934	ko00561
59	Inositol phosphate metabolism	5 (1.4%)	63 (1.47%)	0.61343	ko00562
60	Arginine and proline metabolism	8 (2.23%)	102 (2.38%)	0.62601	ko00330
61	Amino sugar and nucleotide sugar metabolism	9 (2.51%)	116 (2.7%)	0.64073	ko00520
62	Plant hormone signal transduction	15 (4.19%)	194 (4.52%)	0.66212	ko04075
63	Glyoxylate and dicarboxylate metabolism	5 (1.4%)	67 (1.56%)	0.66832	ko00630
64	Other glycan degradation	1 (0.28%)	13 (0.3%)	0.67814	ko00511
65	Natural killer cell mediated cytotoxicity	1 (0.28%)	13 (0.3%)	0.67814	ko04650
66	Carbon fixation in photosynthetic organisms	13 (3.63%)	172 (4.01%)	0.68855	ko00710
67	Alanine, aspartate and glutamate metabolism	5 (1.4%)	71 (1.65%)	0.71787	ko00250
68	Peroxisome	6 (1.68%)	90 (2.1%)	0.77387	ko04146
69	Limonene and pinene degradation	1 (0.28%)	18 (0.42%)	0.79208	ko00903
70	Pantothenate and CoA biosynthesis	2 (0.56%)	35 (0.82%)	0.80257	ko00770
71	Circadian rhythm - plant	1 (0.28%)	21 (0.49%)	0.84007	ko04712
72	Phenylalanine, tyrosine and tryptophan biosynthesis	2 (0.56%)	39 (0.91%)	0.84884	ko00400
73	Base excision repair	2 (0.56%)	39 (0.91%)	0.84884	ko03410
74	Phosphatidylinositol signaling system	2 (0.56%)	42 (0.98%)	0.87683	ko04070
75	Protein export	2 (0.56%)	45 (1.05%)	0.89998	ko03060
76	Cyanoamino acid metabolism	2 (0.56%)	46 (1.07%)	0.90675	ko00460
77	Cysteine and methionine metabolism	6 (1.68%)	110 (2.56%)	0.90727	ko00270
78	Glycolysis / Gluconeogenesis	11 (3.07%)	183 (4.26%)	0.90847	ko00010
79	Plant-pathogen interaction	7 (1.96%)	127 (2.96%)	0.91573	ko04626
80	Valine, leucine and isoleucine biosynthesis	2 (0.56%)	51 (1.19%)	0.93463	ko00290
81	N-Glycan biosynthesis	1 (0.28%)	32 (0.75%)	0.939	ko00510
82	Phagosome	5 (1.4%)	109 (2.54%)	0.9567	ko04145
83	RNA polymerase	1 (0.28%)	38 (0.89%)	0.96399	ko03020
84	Purine metabolism	7 (1.96%)	147 (3.42%)	0.96831	ko00230
85	Aminoacyl-tRNA biosynthesis	1 (0.28%)	49 (1.14%)	0.98632	ko00970
86	Ribosome biogenesis in eukaryotes	3 (0.84%)	93 (2.17%)	0.98705	ko03008
87	Pyruvate metabolism	4 (1.12%)	123 (2.87%)	0.9938	ko00620
88	Ubiquitin mediated proteolysis	2 (0.56%)	90 (2.1%)	0.9966	ko04120
89	Pyrimidine metabolism	3 (0.84%)	113 (2.63%)	0.99689	ko00240
90	Citrate cycle (TCA cycle)	1 (0.28%)	84 (1.96%)	0.99938	ko00020
91	mRNA surveillance pathway	2 (0.56%)	112 (2.61%)	0.99942	ko03015
92	RNA degradation	1 (0.28%)	87 (2.03%)	0.99953	ko03018
93	Endocytosis	1 (0.28%)	96 (2.24%)	0.99979	ko04144
94	Oxidative phosphorylation	8 (2.23%)	254 (5.92%)	0.99984	ko00190
95	RNA transport	5 (1.4%)	196 (4.57%)	0.99984	ko03013
96	Protein processing in endoplasmic reticulum	4 (1.12%)	175 (4.08%)	0.99984	ko04141
97	Spliceosome	1 (0.28%)	151 (3.52%)	1	ko03040
